# Supplementary material for: Mental Health Status of Children in Conflict with Law Residing in the Correction Homes in Bagmati Province, Nepal: A Mixed Method Study
Source: Research Square preprint supplement (doi:10.21203/rs.3.rs-6057968/v1), 2025-04-10
Supplement: Supplementary file 1 [file f76a568e057a32aa22de5ebc.docx]

**Mental Health Status of Children in Conflict with Law residing in the Correction Homes in Bagmati Province: A Mixed Method Study**

**Individual Factors**

| **S.**  **N.** | **Questions** | **Categories** | **Remarks** |
| --- | --- | --- | --- |
| **1** | How old are you? | **…** **years** |  |
| **2** | Sex | Male Female  Others |  |
| **3** | Ethnicity | Brahmin Chhetri Janajati Dalit  Others………………. |  |
| **4** | Religion | Hindu Buddhist Christain Muslims  Others……………….. |  |
| **5** | Educational status | Illiterate Literate  Basic Education Secondary level education Drop out |  |
| **6** | If drop out, what is the reason? | …………… |  |
| **7** | If drop out, which activities you were engaged in? | Keeping idle Child labour  Helping in family activities  Wandering in the street Others………………….. |  |
| **8** | Former Residence | Urban  Rular |  |
| **9** | At what age did you come  here? | … years |  |
| **10** | Length of stay | ………years… months |  |
| **11** | Did you use any  tobacco products? | No  Yes |  |
| **12** | If yes, at what age had you started? | ………………. |  |

| **13** | If yes, what did you take? | Cigarette Khaini Gutka Drugs  Others………………. |  |
| --- | --- | --- | --- |
| **14** | Did you take alcohol in the  past? | No  Yes |  |
| **15** | If yes, at what age had you  started | … years |  |
| **16** | Do you take any substance  currently? | No  Yes |  |
| **17** | Childhood dream | …………. |  |
| **18** | Do you have any plans after you leave from here? | No Yes |  |
| **19** | If yes, what are they? | ………… |  |
| **19** | Have you suffered from any kind of mental illness in the  past? | No Yes |  |
| **20** | If yes, what are they? | ………. |  |

- 1. **Family Factors**

| **S.N.** | **Questions** | **Categories** | **Remarks** |
| --- | --- | --- | --- |
| **F1** | Do you have Parents? | Both father and mother Only father  Only mother None of them |  |
| **F2** | Marital status of parents | Together Divorced Separated |  |
| F3 | Father's education | Illiterate Literate  Basic Education Secondary level education Universities |  |

| F4 | Father’s occupation | Agriculture Services  Foreign employment Business  Labor job  Homemaker |  |
| --- | --- | --- | --- |
| F5 | Mother’s education | Illiterate Literate  Basic Education Secondary level education Universities |  |
| F6 | Mother’s occupation | Agriculture Services  Foreign employment Business  Labor job  Homemaker |  |
| F7 | Family monthly income | ……………. |  |
| F8 | With whom did you stay before? | with parents  with grandparents with relatives with friends  If others then please specify  ==========================  === |  |
| F8 | Types of family | Nuclear (parents, son /daughter) Joint (parents, son /daughter, grandparents)  Extended (parents, /daughter, grandparents, uncle, aunt, cousins) |  |
| F9 | Family Income | Rs …………….. |  |
| F10 | Family size | ……………… |  |
| F11 | Do any of your family members have criminal records? | No Yes |  |
| F12 | Family conflict | No Yes |  |

| F13 | If yes, what kind ? | Scolding Beating Hitting  Others |  |
| --- | --- | --- | --- |
| F14 | What are the reason for conflicts ? | Poverty Unemployment Alcoholism Misbehavior  Others |  |
| F15 | How did you grow up ? | With overcrowding members In a poverty condition Conflicting nature of  Parents |  |

#### Psychological factors

| **S.N.** | **Questions** | **Coding Categories** | **Remarks** |
| --- | --- | --- | --- |
| P1 | Did any person abused you? | Yes  No |  |
| P2 | If yes, which type of abuse did you experienced? | Physical abuse Mental abuse Sexual abuse  Others ………….. |  |
| P3 | Did you receive any kind of punishment in the past ? | No Yes |  |
| P4 | If yes, where did you receive? | Home School  School and home |  |
| P5 | If any problem arises, whom do you say? | Friends  ………..  Solve it by yourself |  |
| P6 | Is there any factor that is  recurrently disturbing you? | No Yes |  |

- 1. **Correction Home Environment**

| **S.N.** | **Questions** | **Coding Categories** | **Remarks** |
| --- | --- | --- | --- |
| C1 | What made you to stay here? | Sexual harassment/rape Rape  Theft  Drug abuse  Murder/ Attempt to murder Others………………. |  |

| C2 | How often do you utilize  counselling services? | ……………… |  |
| --- | --- | --- | --- |
| C3 | Participation in Physical activity | No Yes |  |
| C4 | Recreational activities | No  Yes |  |
|  | **Questions related to the attitude towards the correction home** | |  |
| C5 | You are changing in a positive way while living in the correction home. |  |  |
| 1. Completely disagree 1. disagree 2. Neutral 3. Agree 4. Completely agree | | | |
| C6 | Your life will be difficult after leaving the correction home. |  |  |
| 1. Completely disagree 1. disagree 2. Neutral 3. Agree 4. Completely agree | | | |
| C7 | The rules of the correction home are supporting you to be good human being. |  |  |
| 1. Completely disagree 1. disagree 2. Neutral 3. Agree 4. Completely agree | | | |

1. **DASS 21 Scale**

| Please read each statement and circle a number 0, 1, 2 or 3 which indicates how much the statement applied to you over the past week. There is no right or wrong answers. Do not spend too much time on any statement  The rating scale is as follows:   1. Did not apply to me at all 2. Applied to me to some degree, or some of the time 3. Applied to me to a considerable degree or a good part of time 4. Applied to me very much or most of the time | | | | | |
| --- | --- | --- | --- | --- | --- |
| B1 | I found it hard to wind down | 0 | 1 | 2 | 3 |
| B2 | I was aware of dryness of my mouth | 0 | 1 | 2 | 3 |
| B3 | I couldn’t seem to experience any positive feeling  at all | 0 | 1 | 2 | 3 |
| B4 | I experienced breathing difficulty (e.g. excessively rapid breathing, breathlessness in the absence of physical exertion) | 0 | 1 | 2 | 3 |
| B5 | I found it difficult to work up the initiative to do  things | 0 | 1 | 2 | 3 |
| B6 | I tended to over-react to situations | 0 | 1 | 2 | 3 |
| B7 | I experienced trembling (e.g. in the hands) | 0 | 1 | 2 | 3 |
| B8 | I felt that I was using a lot of nervous energy | 0 | 1 | 2 | 3 |
| B9 | I was worried about situations in which I might panic and make a fool of myself | 0 | 1 | 2 | 3 |
| B10 | I felt that I had nothing to look forward to | 0 | 1 | 2 | 3 |
| B11 | I found myself getting agitated | 0 | 1 | 2 | 3 |

| B12 | I found it difficult to relax | 0 | 1 | 2 | 3 |
| --- | --- | --- | --- | --- | --- |
| B13 | I felt down-hearted and blue | 0 | 1 | 2 | 3 |
| B14 | I was intolerant of anything that kept me from  getting on with what I was doing | 0 | 1 | 2 | 3 |
| B15 | I felt I was close to panic | 0 | 1 | 2 | 3 |
| B16 | I was unable to become enthusiastic about  anything | 0 | 1 | 2 | 3 |
| B17 | I felt I wasn’t worth much as a person | 0 | 1 | 2 | 3 |
| B18 | I felt that I was rather touchy | 0 | 1 | 2 | 3 |
| B19 | I was aware of the action of my heart in the absence of physical exertion (e.g. sense of heart  rate increase, heart missing a beat) | 0 | 1 | 2 | 3 |
| B20 | I felt scared without any good reason | 0 | 1 | 2 | 3 |
| B21 | I felt that life was meaningless | 0 | 1 | 2 | 3 |

**Key Informant Interview Guideline**

Code:

Sex:

Designation:

**Experience and Perception towards children**

1. How long have you been working at this correction home?

2. How is your Working Experience as your (designation) in this correction home?

3. How difficult is it to manage children in conflict with the law?

4. What is your perception towards children?

5. What type of behavior is shown by children of age 14-17?

**Prevalence and possible causes for mental health problems**

6. In your view, what type of mental health problem is prevalent in these children?

7. What are the possible causes for the mental health problem in these children?

**Working modality of Correction Home**

8. What are the Policies and Guidelines given by government in order to address the mental health needs of these children?

9. How is the support from NGOs to this institution?

10. In your view, is the available provision enough to address the needs of children?

**Barriers and Challenges**

11. What are the barriers/Challenges to implement the policies?

**Area for improvement**

12. What could be done to improve the mental health status of these children?
